# Supplementary material
Source: Springer Nature journal article supplement (https://www.springermedizin.de/resource/supplementary/13633_2011_8_MOESM2_ESM.pdf/9595476)

**A.****GHD Male**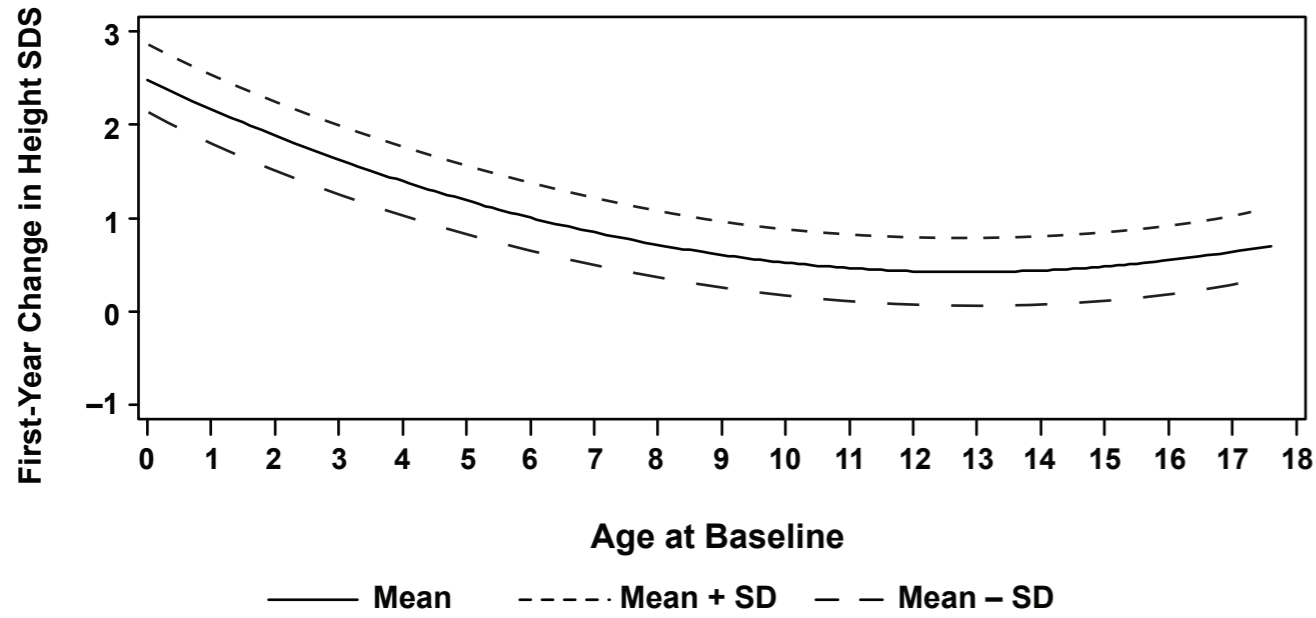**B.****GHD Female**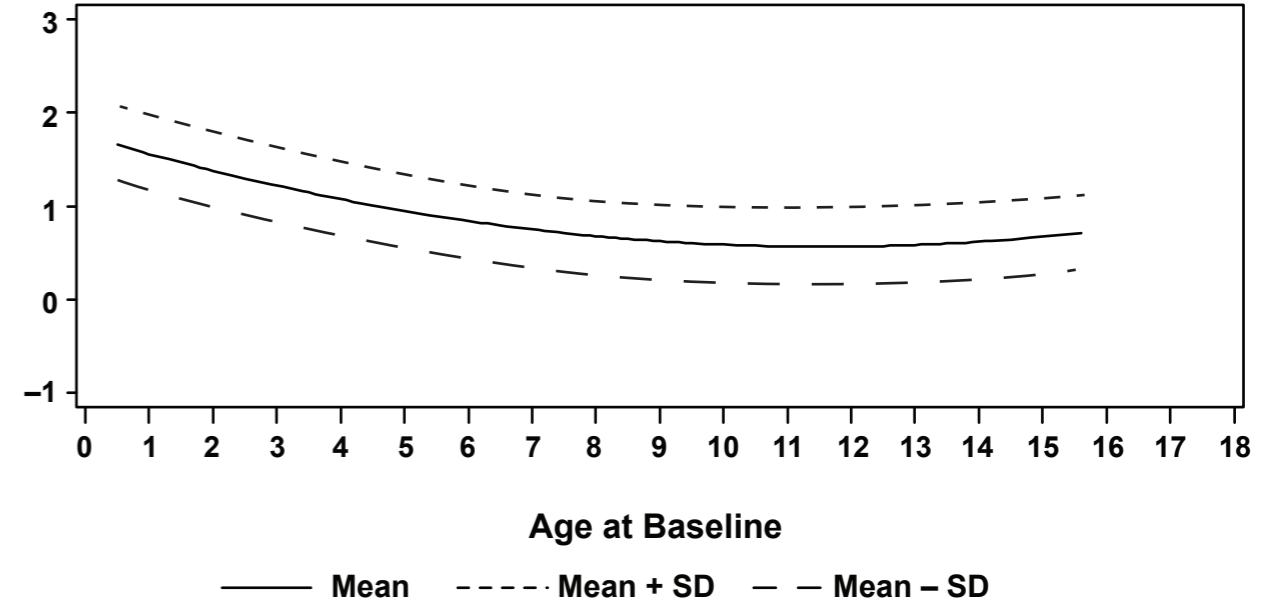**C.****GHD Male**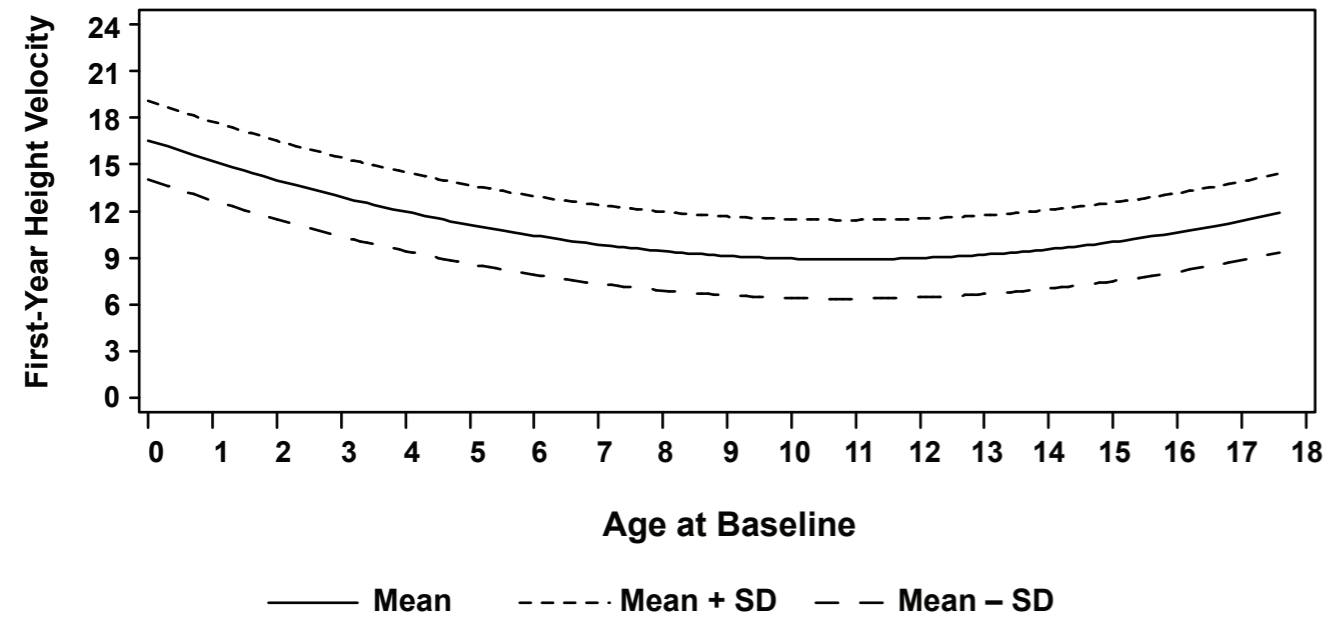**D.****GHD Female**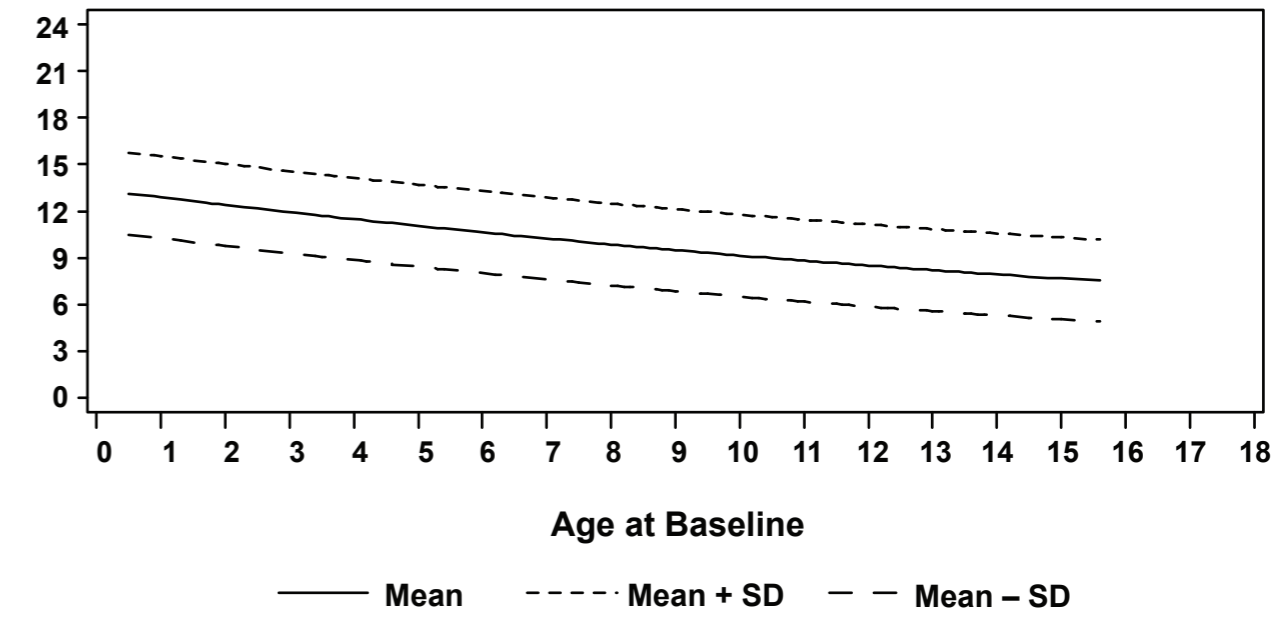

Supplement: MOESM2 [file 9595476]
